# Supplementary material for: MicroRNA-15a/16-1 cluster located at chromosome 13q14 is down-regulated but displays different expression pattern and prognostic significance in multiple myeloma
Source: PubMed Central journal article supplement (PMC4741998; doi:10.18632/oncotarget.5681), 2015-10-12
Supplement: oncotarget-06-38270-s001.pdf [file oncotarget-06-38270-s001.pdf]

## SUPPLEMENTARY TABLES

**Supplementary Table S1: The clinical characteristics of 90 newly diagnosed MM patients**

| Characteristics                                | Arm A<br>N = 49 | Arm B<br>N = 41 | P     |
|------------------------------------------------|-----------------|-----------------|-------|
| Age (years), median (range)                    | 58 (40–77)      | 58 (44–79)      | 0.524 |
| Sex, F/M                                       | 19/30           | 16/25           | 0.981 |
| Isotype, N (%)                                 |                 |                 |       |
| IgG                                            | 26/49 (53.1)    | 18/41 (43.9)    | 0.07  |
| IgA                                            | 17/49 (34.7)    | 9/41 (21.9)     |       |
| IgD                                            | 1/49 (2.0)      | 5/41 (12.2)     |       |
| Light chains                                   | 5/49 (10.2)     | 9/41 (22.0)     |       |
| ISS stage, N (%)                               |                 |                 | 0.789 |
| I                                              | 5/46 (10.9)     | 6/40 (15.0)     |       |
| II                                             | 15/46 (32.6)    | 11/40 (27.5)    |       |
| III                                            | 26/46 (56.5)    | 23/40 (57.5)    |       |
| β2-microglobulin (mg/dL)                       | 5.59 (2.3–39.1) | 6.2 (1.4–23.9)  | 0.749 |
| Durie-Salmon stage, N (%)                      |                 |                 | 0.312 |
| I - II                                         | 3/45 (6.7)      | 7/41 (17.1)     |       |
| III                                            | 42/45 (93.3)    | 34/41 (82.9)    |       |
| BM plasmacytosis (%), median (range)           | 34.0 (5.0–87.5) | 25.8 (3.0–86.5) | 0.566 |
| Renal lesion, N (%)                            |                 |                 | 0.119 |
| None                                           | 38/46 (82.6)    | 28/41 (68.3)    |       |
| Present                                        | 8/46 (17.4)     | 13/41 (31.7)    |       |
| Cytogenetic abnormalities, N (%)               |                 |                 |       |
| Del(13q)                                       | 16/49 (32.7)    | 14/41 (34.1)    | 0.881 |
| Del(17p)                                       | 3/47 (6.4)      | 7/41 (17.1)     | 0.115 |
| IGH translocation                              | 29/46 (63.0)    | 23/40 (57.5)    | 0.600 |
| t(11;14)                                       | 7/41 (17.1)     | 7/39 (17.9)     | 0.918 |
| t(4;14)                                        | 7/41 (17.1)     | 9/39 (23.1)     | 0.502 |
| t(14;16)                                       | 1/41 (2.4)      | 4/38 (10.5)     | 0.140 |
| Amp(1q21)                                      | 23/44 (52.3)    | 21/38 (55.3)    | 0.787 |
| High-risk [(any t(4;14), t(14;16) or del(17p)] | 9/43 (20.9)     | 13/39 (33.3)    | 0.206 |

F, female; M, male; ISS, International Staging System; Ig, immunoglobulin; BM, bone marrow; Arm A, thalidomide-based therapy; Arm B, bortezomib-based therapy.

**Supplementary Table S2: The clinical characteristics and the remission status in 16 remission MM patients**

|         | Age (years) | Isotype       | D-S stage | ISS stage | Cytogenetic abnormalities    | Treatment | Status of disease | miRNA-15a | miRNA-16-1 |
|---------|-------------|---------------|-----------|-----------|------------------------------|-----------|-------------------|-----------|------------|
| Case 1  | 63          | IgA $\lambda$ | III       | II        | Del(13q); t(4;14)            | Arm B     | CR                | 2.68      | 2.72       |
| Case 2  | 42          | IgG $\kappa$  | III       | I         | Del(13q); amp(1q21); t(4;14) | Arm B     | VGPR              | 3.83      | 2.47       |
| Case 3  | 49          | IgG $\kappa$  | III       | II        | Amp(1q21); t(11;14)          | Arm B     | VGPR              | 3.43      | 3.2        |
| Case 4  | 44          | IgG $\kappa$  | II        | I         | Negative                     | Arm B     | VGPR              | 4.5       | 3.6        |
| Case 5  | 43          | IgG $\kappa$  | III       | I         | Negative                     | Arm B     | VGPR              | 4.65      | 3.99       |
| Case 6  | 63          | IgA $\lambda$ | III       | I         | Negative                     | Arm A     | VGPR              | 3.53      | 1.87       |
| Case 7  | 45          | IgA $\lambda$ | III       | II        | Negative                     | Arm B     | CR                | 2.33      | 2.4        |
| Case 8  | 61          | IgA $\kappa$  | III       | III       | Del(13q); t(4;14)            | Arm B     | CR                | 4.88      | 4.15       |
| Case 9  | 51          | IgG $\kappa$  | III       | II        | t(4;14)                      | Arm B     | VGPR              | 4.12      | 4.5        |
| Case 10 | 53          | IgD $\lambda$ | III       | III       | t(11;14)                     | Arm B     | CR                | 3.49      | 3.68       |
| Case 11 | 59          | $\kappa$      | III       | II        | Negative                     | Arm A     | CR                | 3.95      | 3.78       |
| Case 12 | 34          | IgG $\kappa$  | III       | I         | Del(13q); t(4;14)            | Arm B     | VGPR              | 3.78      | 3.13       |
| Case 13 | 61          | IgA $\lambda$ | III       | III       | Del(13q); del(17p); IgH      | Arm A     | VGPR              | 4.29      | 2.64       |
| Case 14 | 58          | IgA $\kappa$  | III       | III       | Negative                     | Arm A     | VGPR              | 3.52      | 2.6        |
| Case 15 | 43          | IgG $\lambda$ | III       | I         | Amp(1q21)                    | Arm B     | CR                | 2.68      | 3.17       |
| Case 16 | 68          | IgG $\kappa$  | II        | II        | t(11;14)                     | Arm B     | VGPR              | 3.48      | 3.31       |

D-S stage, Durie-Salmon stage; Arm A, thalidomide-based therapy; Arm B, bortezomib-based therapy; CR, complete remission; VGPR, very good partial remission
